# Supplementary material for: High-serum MMP-8 levels are associated with decreased survival and systemic inflammation in colorectal cancer
Source: PubMed Central journal article supplement (PMC6048114; doi:10.1038/s41416-018-0136-4), 2018-05-29
Supplement: 41416_2018_136_MOESM1_ESM.pdf [file 41416_2018_136_MOESM1_ESM.pdf]

## Supplementary online material

### **High serum MMP-8 levels are associated with decreased survival and systemic inflammation in colorectal cancer**

Päivi Sirniö<sup>1,2</sup>, Anne Tuomisto<sup>1,2</sup>, Taina Tervahartiala<sup>3</sup>, Timo Sorsa<sup>3</sup>, Kai Klintrup<sup>2,4</sup>, Toni Karhu<sup>5</sup>, Karl-Heinz Herzig<sup>2,5,6</sup>, Jyrki Mäkelä<sup>2,4</sup>, Tuomo J. Karttunen<sup>1,2</sup>, Tuula Salo<sup>1,2,3,7</sup>, Markus J. Mäkinen<sup>1,2</sup>, Juha P. Väyrynen<sup>1,2</sup>

<sup>1</sup>Cancer and Translational Medicine Research Unit, University of Oulu, POB 5000, 90014 Oulu, Finland

<sup>2</sup>Oulu University Hospital and Medical Research Center Oulu, POB 21, 90029 Oulu, Finland

<sup>3</sup>Department of Oral and Maxillofacial Diseases, University of Helsinki, Haartmaninkatu 8, POB 63, 00014, Helsinki Finland

<sup>4</sup>Research Unit of Surgery, Anesthesia and Intensive Care, University of Oulu, POB 5000, 90014 Oulu, Finland

<sup>5</sup>Research Unit of Biomedicine and Biocenter Oulu, Department of Physiology, University of Oulu, POB 5000, 90014 Oulu, Finland

<sup>6</sup>Department of Gastroenterology and Metabolism, Poznan University of Medical Sciences, ul. Szpitalna 27/33, 60-572, Poznan, Poland

<sup>7</sup>Helsinki University Hospital, 00014 Helsinki, Finland

**Table S1. Antibodies and protocols used in immunohistochemistry**

| Cell type                | Antigen             | Antigen retrieval | Antibody type    | Manufacturer      | Clone     | Code         | Dilution | Incubation | Antibody visualization |
|--------------------------|---------------------|-------------------|------------------|-------------------|-----------|--------------|----------|------------|------------------------|
| T cells                  | CD3                 | Tris-EDTA pH9*    | mouse monoclonal | Novocastra        | PS1       | NCL-CD3-PS1  | 1:50     | 30 min     | EnVision               |
| Cytotoxic cells          | T CD8               | Tris-EDTA pH9*    | mouse monoclonal | Novocastra        | 4B11      | NCL-CD8-4B11 | 1:200    | 30 min     | EnVision               |
| Regulatory cells         | T FoxP3             | Tris-EDTA pH9*    | mouse monoclonal | Abcam             | 236A/E7   | ab20034      | 1:100    | 30 min     | EnVision               |
| Macrophages              | CD68                | Tris-EDTA pH9*    | mouse monoclonal | DAKO              | PG-M1     | M0876        | 1:100    | 30 min     | EnVision               |
| Neutrophils              | Neutrophil elastase | Tris-EDTA pH9*    | mouse monoclonal | DAKO              | NP57      | M0752        | 1:200    | 30 min     | EnVision               |
| Mast cells               | Mast cell tryptase  | Tris-EDTA pH9*    | mouse monoclonal | DAKO              | AA1       | M7052        | 1:2000   | 30 min     | EnVision               |
| MLH1 <sup>+</sup> cells  | MLH1                | Tris-EDTA pH9*    | mouse monoclonal | Novocastra        | ES05      | NCL-L-MLH1   | 1:100    | 90 min     | EnVision               |
| MSH2 <sup>+</sup> cells  | MSH2                | Tris-EDTA pH9*    | mouse monoclonal | BD-Pharmingen     | G219-1129 | 556349       | 1:200    | 60 min     | EnVision               |
| MSH6 <sup>+</sup> cells  | MSH6                | Tris-EDTA pH9*    | mouse monoclonal | BD-Pharmingen     | 44/MSH6   | 610919       | 1:150    | 90min      | EnVision               |
| PMS2 <sup>+</sup> cells  | PMS2                | Tris-EDTA pH9*    | mouse monoclonal | BD-Pharmingen     | A16-4     | 556415       | 1:100    | 90 min     | EnVision               |
| BRAF V600E mutated cells | BRAF V600E          | Ventana CC1       | mouse monoclonal | Spring Bioscience | VE1       | E19292       | 1:2000   | 32 min     | Optiview               |

\*In a microwave oven at 800W for 2 min and at 150W for 15 min.

**Table S2.** Serum MMP-8 levels in relation to clinical and pathological characteristics of CRCs in Cohort 2

|                                                                          | MMP-8, median (IQR) | p value |
|--------------------------------------------------------------------------|---------------------|---------|
| <b>Age</b>                                                               |                     |         |
| < 65 (n=44)                                                              | 55.8 (33.4-83.6)    | 0.085   |
| ≥ 65 (n=111)                                                             | 74.0 (42.8-121.2)   |         |
| <b>Sex</b>                                                               |                     |         |
| Male (n=80)                                                              | 68.4 (37.8-106.5)   | 0.427   |
| Female (n=75)                                                            | 68.4 (45.2-118.4)   |         |
| <b>BMI</b>                                                               |                     |         |
| <25 (n=47)                                                               | 60.8 (39.2-100.8)   | 0.451   |
| 25-30 (n=61)                                                             | 68.4 (37.4-105.8)   |         |
| >30 (n=41)                                                               | 74.4 (45.8-124.2)   |         |
| <b>Tumor location</b>                                                    |                     |         |
| Proximal colon (n=67)                                                    | 76.4 (45.6-120.0)   | 0.414   |
| Distal colon (n=44)                                                      | 58.2 (40.8-87.5)    |         |
| Rectum (n=44)                                                            | 64.6 (27.6-105.8)   |         |
| <b>WHO grade</b>                                                         |                     |         |
| Grade 1 (n=51)                                                           | 53.2 (34.0-120.0)   | 0.341   |
| Grade 2 (n=85)                                                           | 68.4 (43.0-101.6)   |         |
| Grade 3 (n=19)                                                           | 94.0 (56.4-121.2)   |         |
| <b>TNM stage</b>                                                         |                     |         |
| Stage I (n=40)                                                           | 71.2 (37.6-98.6)    | 0.005   |
| Stage II (n=44)                                                          | 63.4 (34.9-107.8)   |         |
| Stage III (n=51)                                                         | 63.6 (32.8-100.4)   |         |
| Stage IV (n=20)                                                          | 122.8 (61.9-258.3)  |         |
| <b>Depth of invasion</b>                                                 |                     |         |
| T1 (n=11)                                                                | 51.6 (37.2-158.4)   | 0.015   |
| T2 (n=40)                                                                | 75.8 (41.2-101.0)   |         |
| T3 (n=89)                                                                | 60.8 (38.0-99.6)    |         |
| T4 (n=15)                                                                | 122.4 (65.2-416.0)  |         |
| <b>Nodal metastases</b>                                                  |                     |         |
| N0 (n=85)                                                                | 68.4 (37.4-105.8)   | 0.227   |
| N1 (n=48)                                                                | 66.4 (34.3-143.1)   |         |
| N2 (n=22)                                                                | 75.6 (52.6-120.6)   |         |
| <b>Distant metastases</b>                                                |                     |         |
| M0 (n=135)                                                               | 64.0 (37.2-100.4)   | 3.6E-4  |
| M1 (n=20)                                                                | 122.8 (61.9-258.3)  |         |
| <b>Lymphatic invasion</b>                                                |                     |         |
| No (n=79)                                                                | 66.0 (38.4-93.2)    | 0.111   |
| Yes (n=76)                                                               | 71.8 (44.4-125.1)   |         |
| <b>Blood vessel invasion</b>                                             |                     |         |
| No (n=131)                                                               | 66.0 (38.4-104.4)   | 0.049   |
| Yes (n=24)                                                               | 84.8 (56.5-208.6)   |         |
| <b>Peritumoral inflammatory cell infiltrate (Klintrup-Mäkinen score)</b> |                     |         |
| Low-grade (n=60)                                                         | 72.2 (47.3-124.5)   | 0.106   |
| High-grade (n=95)                                                        | 66.0 (37.2-104.4)   |         |
| <b>Immunoscore</b>                                                       |                     |         |
| 0-1 (n=66)                                                               | 72.2 (46.8-123.3)   | 0.133   |
| 2-4 (n=89)                                                               | 66.0 (34.8-107.2)   |         |
| <b>BRAF VE1 immunohistochemistry</b>                                     |                     |         |
| Negative (n=138)                                                         | 63.8 (38.2-101.6)   | 0.021   |
| Positive (n=17)                                                          | 107.2 (67.0-140.6)  |         |
| <b>MMR enzyme status</b>                                                 |                     |         |
| MMR-deficient (n=27)                                                     | 82.0 (53.2-128.4)   | 0.174   |
| MMR-proficient (n=128)                                                   | 64.6 (38.8-101.4)   |         |
| <b>Modified Glasgow Prognostic Score</b>                                 |                     |         |
| 0 (n=118)                                                                | 62.2 (37.0-100.5)   | 0.014   |
| 1 (n=33)                                                                 | 76.4 (46.6-167.2)   |         |
| 2 (n=3)                                                                  | 356.0 (215.6-398.8) |         |

Abbreviations: IQR: interquartile range, MMR: mismatch repair. P values are for Mann-Whitney or Kruskal-Wallis test.

**Table S3.** Serum MMP-8 levels in relation to clinical and pathological characteristics of CRCs in the combined cohort

|                                                                          | MMP-8, median (IQR) | p value |
|--------------------------------------------------------------------------|---------------------|---------|
| <b>Age</b>                                                               |                     |         |
| < 65 (n=87)                                                              | 53.2 (27.9-91.2)    | 0.138   |
| ≥ 65 (n=184)                                                             | 70.6 (28.9-123.4)   |         |
| <b>Sex</b>                                                               |                     |         |
| Male (n=138)                                                             | 60.8 (27.2-108.6)   | 0.290   |
| Female (n=133)                                                           | 68.8 (30.6-123.6)   |         |
| <b>BMI</b>                                                               |                     |         |
| <25 (n=94)                                                               | 68.5 (32.0-126.6)   | 0.390   |
| 25-30 (n=106)                                                            | 63.0 (22.9-108.6)   |         |
| >30 (n=63)                                                               | 66.0 (28.4-123.6)   |         |
| <b>Tumor location</b>                                                    |                     |         |
| Proximal colon (n=115)                                                   | 72.3 (32.8-122.4)   | 0.406   |
| Distal colon (n=72)                                                      | 61.4 (36.6-116.0)   |         |
| Rectum (n=84)                                                            | 54.8 (24.9-118.4)   |         |
| <b>WHO grade</b>                                                         |                     |         |
| Grade 1 (n=67)                                                           | 47.6 (22.8-107.2)   | 0.153   |
| Grade 2 (n=171)                                                          | 68.4 (31.3-121.1)   |         |
| Grade 3 (n=32)                                                           | 83.0 (34.3-145.2)   |         |
| <b>TNM stage</b>                                                         |                     |         |
| Stage I (n=59)                                                           | 51.6 (30.0-88.0)    | 6.8E-7  |
| Stage II (n=89)                                                          | 63.5 (23.3-110.3)   |         |
| Stage III (n=81)                                                         | 56.4 (23.9-101.6)   |         |
| Stage IV (n=41)                                                          | 123.2 (69.0-252.0)  |         |
| <b>Depth of invasion</b>                                                 |                     |         |
| T1 (n=16)                                                                | 50.8 (19.9-110.7)   | 0.001   |
| T2 (n=59)                                                                | 54.0 (27.9-91.2)    |         |
| T3 (n=171)                                                               | 63.6 (27.2-117.9)   |         |
| T4 (n=24)                                                                | 158.0 (66.5-382.2)  |         |
| <b>Nodal metastases</b>                                                  |                     |         |
| N0 (n=153)                                                               | 62.6 (27.6-107.6)   | 0.094   |
| N1 (n=75)                                                                | 64.0 (26.8-149.2)   |         |
| N2 (n=41)                                                                | 72.8 (46.4-136.1)   |         |
| <b>Distant metastases</b>                                                |                     |         |
| M0 (n=230)                                                               | 56.6 (24.7-102.3)   | 2.8E-8  |
| M1 (n=41)                                                                | 123.2 (69.0-252.0)  |         |
| <b>Lymphatic invasion</b>                                                |                     |         |
| No (n=144)                                                               | 50.4 (24.0-90.9)    | 3.1E-4  |
| Yes (n=124)                                                              | 76.8 (44.4-149.1)   |         |
| <b>Blood vessel invasion</b>                                             |                     |         |
| No (n=221)                                                               | 60.8 (26.2-107.2)   | 0.001   |
| Yes (n=47)                                                               | 94.0 (56.4-166.8)   |         |
| <b>Peritumoral inflammatory cell infiltrate (Klintrup-Mäkinen score)</b> |                     |         |
| Low-grade (n=125)                                                        | 73.9 (36.5-134.5)   | 0.014   |
| High-grade (n=146)                                                       | 56.1 (27.1-105.5)   |         |
| <b>Immunoscore</b>                                                       |                     |         |
| 0-1 (n=113)                                                              | 72.8 (40.1-132.8)   | 0.050   |
| 2-4 (n=158)                                                              | 59.1 (26.3-108.3)   |         |
| <b>BRAF VE1 immunohistochemistry</b>                                     |                     |         |
| Negative (n=242)                                                         | 63.0 (27.2-110.3)   | 0.033   |
| Positive (n=29)                                                          | 100.4 (55.3-140.6)  |         |
| <b>MMR enzyme status</b>                                                 |                     |         |
| MMR-deficient (n=38)                                                     | 78.6 (49.5-125.8)   | 0.124   |
| MMR-proficient (n=232)                                                   | 63.5 (27.2-115.2)   |         |
| <b>Modified Glasgow Prognostic Score</b>                                 |                     |         |
| 0 (n=209)                                                                | 59.2 (24.5-100.6)   | 1.0E-6  |
| 1 (n=54)                                                                 | 81.8 (50.0-194.7)   |         |
| 2 (n=7)                                                                  | 280.9 (167.8-356.0) |         |

Abbreviations: IQR: interquartile range, MMR: mismatch repair. P values are for Mann-Whitney or Kruskal-Wallis test.

**Table S4.** Serum MMP-8 levels as two-tiered categorical variable in relation to clinical and pathological characteristics of CRCs in the combined cohort

|                                                                          | Serum MMP-8             |                       | p value |
|--------------------------------------------------------------------------|-------------------------|-----------------------|---------|
|                                                                          | Low ( $\leq 100$ ng/mL) | High ( $> 100$ ng/mL) |         |
| <b>Age</b>                                                               |                         |                       |         |
| < 65 (n=87)                                                              | 66 (75.9%)              | 21 (24.1%)            | 0.078   |
| $\geq 65$ (n=184)                                                        | 120 (65.2%)             | 64 (34.8%)            |         |
| <b>Sex</b>                                                               |                         |                       |         |
| Male (n=138)                                                             | 98 (71.0%)              | 40 (29.0%)            | 0.390   |
| Female (n=133)                                                           | 88 (66.2%)              | 45 (33.8%)            |         |
| <b>BMI</b>                                                               |                         |                       |         |
| <25 (n=94)                                                               | 63 (67.0%)              | 31 (33.0%)            | 0.802   |
| 25-30 (n=106)                                                            | 75 (70.8%)              | 31 (29.2%)            |         |
| >30 (n=63)                                                               | 42 (66.7%)              | 21 (33.3%)            |         |
| <b>Tumor location</b>                                                    |                         |                       |         |
| Proximal colon (n=115)                                                   | 75 (65.2%)              | 40 (34.8%)            | 0.561   |
| Distal colon (n=72)                                                      | 52 (72.2%)              | 20 (27.8%)            |         |
| Rectum (n=84)                                                            | 59 (70.2%)              | 25 (29.8%)            |         |
| <b>WHO grade</b>                                                         |                         |                       |         |
| Grade 1 (n=67)                                                           | 49 (73.1%)              | 18 (26.9%)            | 0.384   |
| Grade 2 (n=171)                                                          | 118 (69.0%)             | 53 (31.0%)            |         |
| Grade 3 (n=32)                                                           | 19 (59.4%)              | 13 (40.6%)            |         |
| <b>TNM stage</b>                                                         |                         |                       |         |
| Stage I (n=59)                                                           | 48 (81.4%)              | 11 (18.6%)            | 6.3E-5  |
| Stage II (n=89)                                                          | 63 (70.8%)              | 26 (29.2%)            |         |
| Stage III (n=81)                                                         | 59 (72.8%)              | 22 (27.2%)            |         |
| Stage IV (n=41)                                                          | 16 (39.0%)              | 25 (61.0%)            |         |
| <b>Depth of invasion</b>                                                 |                         |                       |         |
| T1 (n=16)                                                                | 12 (75.0%)              | 4 (25.0%)             | 3.1E-4  |
| T2 (n=59)                                                                | 48 (81.4%)              | 11 (18.6%)            |         |
| T3 (n=171)                                                               | 118 (69.0%)             | 53 (31.0%)            |         |
| T4 (n=24)                                                                | 8 (33.3%)               | 16 (66.7%)            |         |
| <b>Nodal metastases</b>                                                  |                         |                       |         |
| N0 (n=153)                                                               | 112 (73.2%)             | 41 (28.6%)            | 0.169   |
| N1 (n=75)                                                                | 50 (66.7%)              | 25 (33.3%)            |         |
| N2 (n=41)                                                                | 24 (58.5%)              | 17 (41.5%)            |         |
| <b>Distant metastases</b>                                                |                         |                       |         |
| M0 (n=230)                                                               | 170 (73.9%)             | 60 (26.1%)            | 9.0E-6  |
| M1 (n=41)                                                                | 16 (39.0%)              | 25 (61.0%)            |         |
| <b>Lymphatic invasion</b>                                                |                         |                       |         |
| No (n=144)                                                               | 112 (77.8%)             | 32 (22.2%)            | 0.001   |
| Yes (n=124)                                                              | 72 (58.1%)              | 52 (41.9%)            |         |
| <b>Blood vessel invasion</b>                                             |                         |                       |         |
| No (n=221)                                                               | 160 (72.4%)             | 61 (27.6%)            | 0.004   |
| Yes (n=47)                                                               | 24 (51.1%)              | 23 (48.9%)            |         |
| <b>Peritumoral inflammatory cell infiltrate (Klintrup-Mäkinen score)</b> |                         |                       |         |
| Low-grade (n=125)                                                        | 80 (64.0%)              | 45 (36.0%)            | 0.128   |
| High-grade (n=146)                                                       | 106 (72.6%)             | 40 (27.4%)            |         |
| <b>Immunoscore</b>                                                       |                         |                       |         |
| 0-1 (n=113)                                                              | 73 (64.6%)              | 40 (35.4%)            | 0.235   |
| 2-4 (n=158)                                                              | 113 (71.5%)             | 45 (28.5%)            |         |
| <b>BRAF VE1 immunohistochemistry</b>                                     |                         |                       |         |
| Negative (n=242)                                                         | 172 (71.1%)             | 70 (28.9%)            | 0.012   |
| Positive (n=29)                                                          | 14 (48.3%)              | 15 (51.7%)            |         |
| <b>MMR enzyme status</b>                                                 |                         |                       |         |
| MMR-deficient (n=38)                                                     | 21 (55.3%)              | 17 (44.7%)            | 0.050   |
| MMR-proficient (n=232)                                                   | 165 (71.1%)             | 67 (28.9%)            |         |
| <b>Modified Glasgow Prognostic Score</b>                                 |                         |                       |         |
| 0 (n=209)                                                                | 156 (74.6%)             | 53 (25.4%)            | 9.9E-5  |
| 1 (n=54)                                                                 | 29 (53.7%)              | 25 (46.3%)            |         |
| 2 (n=7)                                                                  | 1 (14.3%)               | 6 (85.7%)             |         |

Abbreviations: IQR: interquartile range, MMR: mismatch repair. P values are for Mann-Whitney or Kruskal-Wallis test.

**Table S5.** Correlations between serum MMP-8 and serum cytokine levels in Cohort 1

|                    | Unadjusted |         | Adjusted |         |
|--------------------|------------|---------|----------|---------|
|                    | Pearson r  | p value | Beta     | p value |
| Serum IL-1ra       | 0.609      | 5.4E-13 | 0.545    | 2.6E-10 |
| Serum IL-4         | 0.372      | 4.3E-5  | 0.335    | 1.0E-4  |
| Serum IL-6         | 0.460      | 2.6E-7  | 0.333    | 1.9E-4  |
| Serum IL-7         | 0.491      | 2.5E-8  | 0.402    | 5.0E-6  |
| Serum IL-8         | 0.550      | 1.9E-10 | 0.433    | 2.5E-5  |
| Serum IL-9         | 0.265      | 0.004   | 0.205    | 0.021   |
| Serum IL-12(p70)   | 0.395      | 1.3E-5  | 0.279    | 0.001   |
| Serum IFN $\gamma$ | 0.350      | 1.2E-4  | 0.288    | 0.001   |
| Serum CXCL10       | 0.278      | 0.0026  | 0.212    | 0.021   |
| Serum CCL2         | 0.340      | 2.1E-4  | 0.288    | 0.001   |
| Serum CCL4         | 0.322      | 4.4E-4  | 0.218    | 0.013   |
| Serum CCL11        | 0.096      | 0.309   | 0.076    | 0.402   |
| Serum PDGF-BB      | 0.471      | 1.1E-7  | 0.279    | 0.001   |

The correlations were adjusted for tumor stage variables (T1-2 vs. T3-4; N0 vs. N1-2; M0 vs. M1), patient age, and patient gender by multiple linear regression. Abbreviations: IL: interleukin; IFN: interferon; CCL: Chemokine (C-C motif) ligand; CXCL: Chemokine (C-X-C motif) ligand; PDGF: Platelet-derived growth factor.

**Table S6.** Receiver operating characteristics (ROC) analysis areas under the curve (AUCs) for different continuous and categorical variables in detecting survivors from non-survivors (cancer specific survival)

| Variable                                                                                  | Area under the curve (AUC) | 95% Confidence interval | P value |
|-------------------------------------------------------------------------------------------|----------------------------|-------------------------|---------|
| <b>Continuous variables</b>                                                               |                            |                         |         |
| Serum MMP-8                                                                               | 0.683                      | 0.600-0.766             | 1.1E-5  |
| Serum CRP                                                                                 | 0.611                      | 0.526-0.696             | 0.008   |
| Serum albumin                                                                             | 0.583                      | 0.498-0.668             | 0.047   |
| Blood neutrophil count                                                                    | 0.599                      | 0.518-0.681             | 0.017   |
| Blood neutrophil/lymphocyte ratio                                                         | 0.593                      | 0.514-0.673             | 0.025   |
| <b>Categorical variables</b>                                                              |                            |                         |         |
| TNM stage (I, II, III, IV)                                                                | 0.858                      | 0.803-0.912             | 1.3E-17 |
| T-class (T1, T2, T3, T4)                                                                  | 0.614                      | 0.532-0.696             | 0.006   |
| N-class (N0, N1, N2)                                                                      | 0.789                      | 0.722-0.857             | 6.5E-12 |
| M-class (M0, M1)                                                                          | 0.732                      | 0.651-0.814             | 2.3E-8  |
| Grade (1, 2, 3)                                                                           | 0.606                      | 0.529-0.683             | 0.011   |
| Lymphatic invasion (no, yes)                                                              | 0.720                      | 0.650-0.791             | 1.7E-7  |
| Blood vessel invasion (no, yes)                                                           | 0.662                      | 0.577-0.747             | 1.2E-4  |
| BRAF VE1 immunohistochemistry (negative, positive)                                        | 0.508                      | 0.427-0.589             | 0.854   |
| MMR status (proficient, deficient)                                                        | 0.581                      | 0.506-0.656             | 0.053   |
| Immunoscore (0, 1, 2, 3, 4)                                                               | 0.722                      | 0.652-0.791             | 9.9E-8  |
| Immunoscore (0-1, 2-4)                                                                    | 0.683                      | 0.608-0.759             | 1.0E-5  |
| Serum MMP-8 ( $\leq 100$ ng/mL, $>100$ ng/mL)                                             | 0.647                      | 0.567-0.728             | 4.0E-4  |
| Serum CRP ( $\leq 20$ mg/L, $>20$ mg/L)                                                   | 0.626                      | 0.540-0.711             | 0.003   |
| mGPS (0, 1, 2)                                                                            | 0.596                      | 0.512-0.681             | 0.021   |
| mGPS (0, 1-2)                                                                             | 0.591                      | 0.507-0.674             | 0.029   |
| <b>Combination variables</b>                                                              |                            |                         |         |
| Serum MMP-8 ( $\leq 100$ ng/mL, $>100$ ng/mL) and Immunoscore (0-1, 2-4)                  | 0.744                      | 0.675-0.812             | 4.7E-9  |
| Serum MMP-8 ( $\leq 100$ ng/mL, $>100$ ng/mL) and serum CRP ( $\leq 20$ mg/L, $>20$ mg/L) | 0.686                      | 0.605-0.767             | 7.9E-6  |
| Serum MMP-8 ( $\leq 100$ ng/mL, $>100$ ng/mL) and depth of tumor invasion (T1-2, T3-4)    | 0.661                      | 0.579-0.743             | 1.2E-4  |
| Serum MMP-8 ( $\leq 100$ ng/mL, $>100$ ng/mL) and nodal metastasis (N0, N1-2)             | 0.782                      | 0.716-0.847             | 2.3E-11 |
| Serum MMP-8 ( $\leq 100$ ng/mL, $>100$ ng/mL) and distant metastasis (M0, M1)             | 0.744                      | 0.665-0.823             | 4.5E-9  |
| Serum MMP-8 ( $\leq 100$ ng/mL, $>100$ ng/mL) and lymphatic invasion (no, yes)            | 0.756                      | 0.686-0.825             | 1.3E-9  |
| Serum MMP-8 ( $\leq 100$ ng/mL, $>100$ ng/mL) and blood vessel invasion (no, yes)         | 0.714                      | 0.634-0.794             | 3.9E-7  |
| Serum MMP-8 ( $\leq 100$ ng/mL, $>100$ ng/mL) and mGPS (0, 1, 2)                          | 0.661                      | 0.579-0.743             | 1.1E-4  |



**Table S7.** Multivariate analysis of 60-month cancer-specific survival (CSS) and overall survival (OS) of CRC patients in the combined cohort

|                                                       | CSS  |            |         | OS   |           |         |
|-------------------------------------------------------|------|------------|---------|------|-----------|---------|
|                                                       | HR   | 95%CI      | p value | HR   | 95%CI     | p value |
| Age (<65 vs. ≥65)                                     | 1.56 | 0.85-2.85  | 0.148   | 1.91 | 1.12-3.28 | 0.018   |
| Tumor invasion (T1-T2 vs. T3-T4)                      | 0.61 | 0.30-1.25  | 0.176   | 0.60 | 0.34-1.05 | 0.071   |
| Nodal metastases (N0 vs. N1-N2)                       | 3.97 | 1.75-8.98  | 0.001   | 2.34 | 1.29-4.26 | 0.005   |
| Distant metastases (M0 vs. M1)                        | 6.21 | 3.18-12.12 | 8.8E-8  | 3.73 | 2.09-6.65 | 7.8E-6  |
| Lymphatic invasion (No vs. Yes)                       | 1.35 | 0.60-3.01  | 0.469   | 1.04 | 0.57-1.90 | 0.902   |
| Grade (1-2 vs. 3)                                     | 2.08 | 1.28-3.38  | 0.003   | 1.96 | 1.33-2.89 | 0.001   |
| mGPS (0 vs. 1-2)                                      | 1.08 | 0.57-2.05  | 0.823   | 1.45 | 0.86-2.46 | 0.162   |
| BRAF VE1 immunohistochemistry (negative vs. positive) | 2.83 | 1.02-7.85  | 0.046   | 1.36 | 0.56-3.33 | 0.495   |
| MMR status (proficient vs. deficient)                 | 0.17 | 0.02-1.33  | 0.091   | 0.80 | 0.32-1.98 | 0.627   |
| Immunoscore (0-1 vs. 2-4)                             | 0.48 | 0.26-0.90  | 0.022   | 0.46 | 0.28-0.77 | 0.003   |
| Serum MMP-8 (≤100 ng/mL vs. >100 ng/mL)               | 2.04 | 1.15-3.62  | 0.015   | 1.60 | 0.98-2.61 | 0.062   |

CSS: n=264; median follow-up time 60.0 months (IQR 36.5-60.0); 57 (21.6%) events; 7 (2.6%) cases excluded from the analysis because of missing values.

OS: n=266; median follow-up time 60.0 months (IQR 36.5-60.0); 81 (30.5%) events; 5 (1.8%) cases excluded from the analysis because of missing values.

Abbreviations: CI: confidence interval, HR: hazard ratio.
